# Supplementary material for: Characterization of SARS-CoV-2 Mutational Signatures from 1.5+ Million Raw Sequencing Samples
Source: MDPI journal article supplement (doi:10.3390/v15010007), 2022-12-20
Supplement: s1 [file s1]

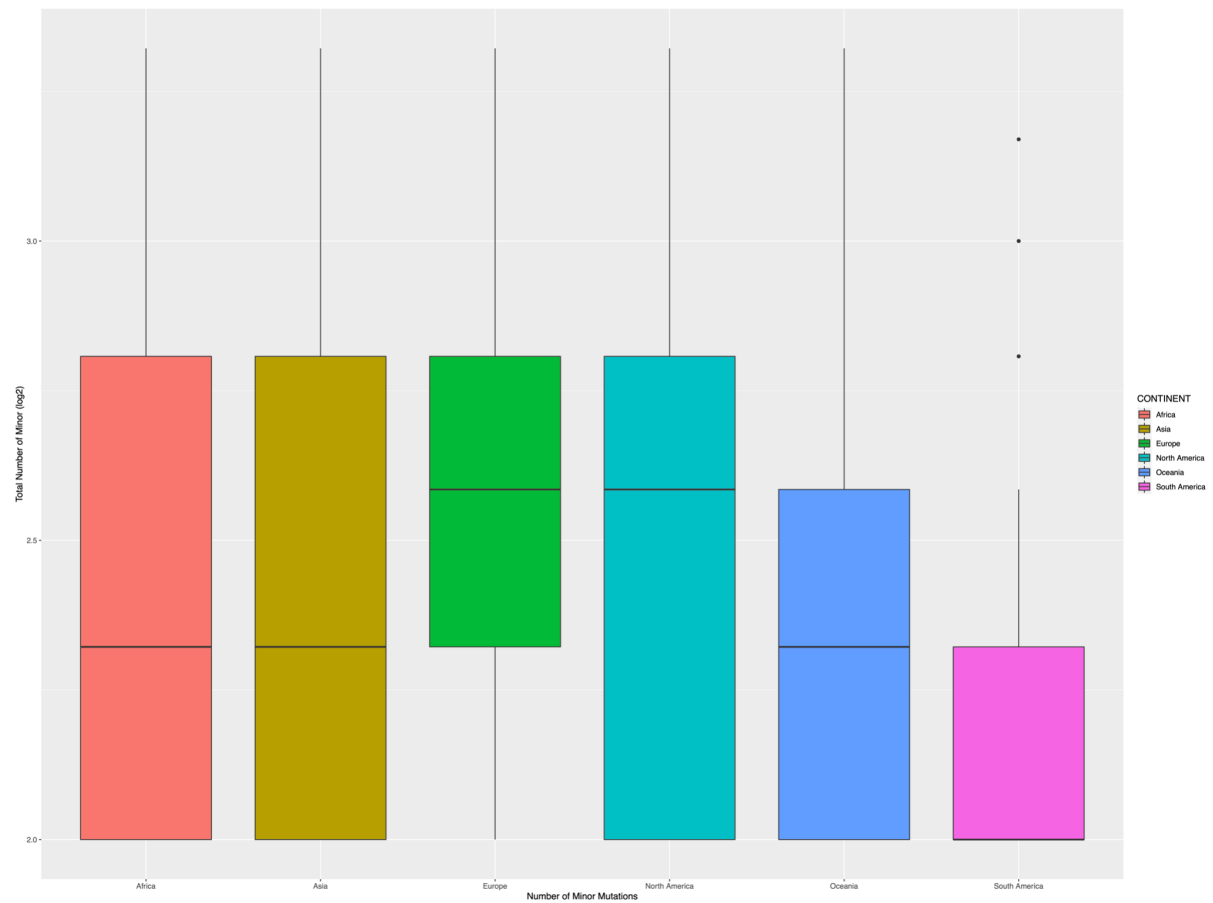

**Figure S1. Number of minor mutations for the medium mutational activity group.** Boxplots showing the number of minor mutations across the different continents for the medium mutational activity group.

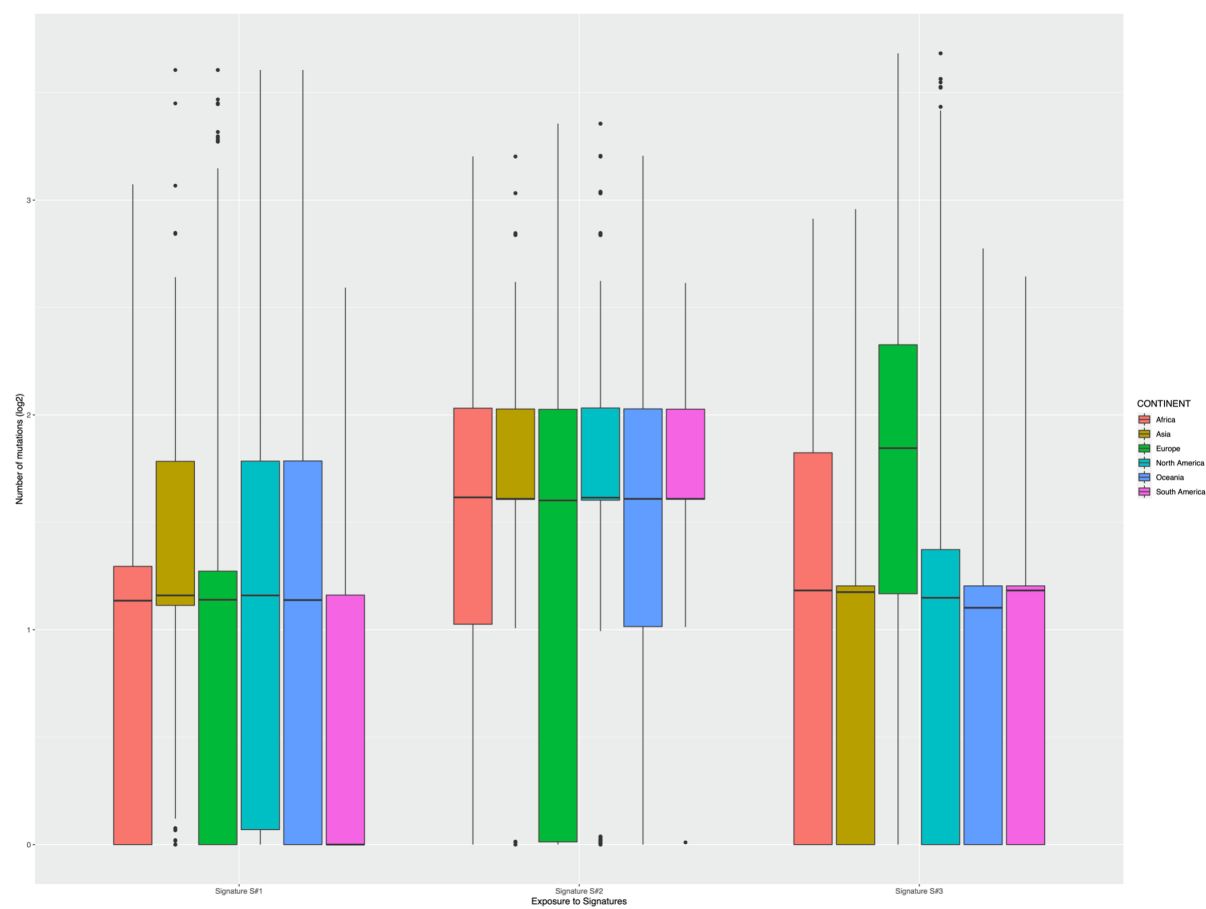

**Figure S2. Number of minor mutations per signature for the medium mutational activity group.** Boxplots showing the number of minor mutations across the different continents divided per signature for the medium mutational activity group.

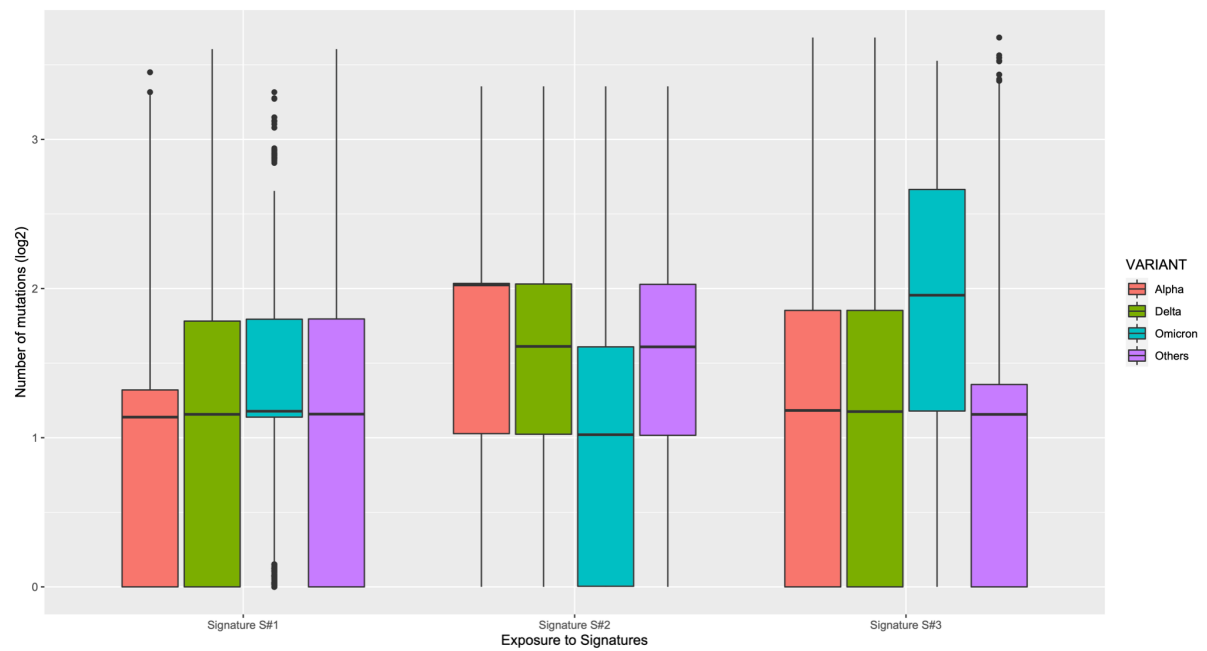

**Figure S3. Signatures activity across SARS-CoV-2 variants for the medium mutational activity group.** Boxplots showing the activity of the three mutational signatures across SARS-CoV-2 variants for the medium mutational activity group.

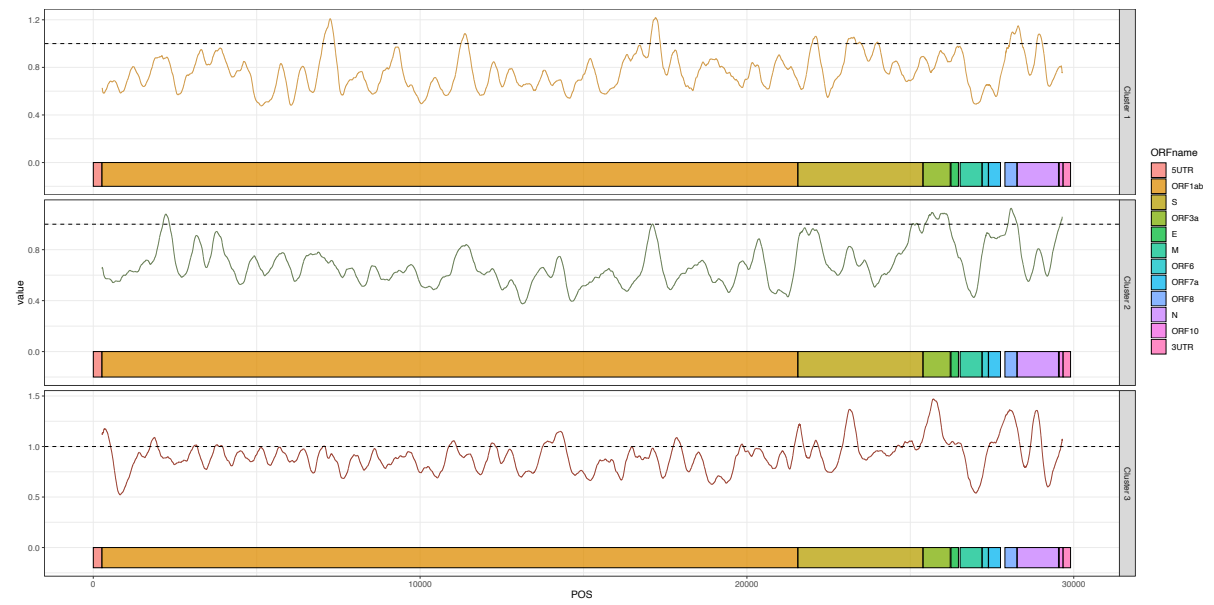

**Figure S4. dN/dS analysis.** dN/dS analysis for the three signature-based clusters.
